# Supplementary material for: Upper Airway Changes after Orthodontic Extraction Treatment in Adults: A Preliminary Study using Cone Beam Computed Tomography
Source: PLoS One. 2015 Nov 20;10(11):e0143233. doi: 10.1371/journal.pone.0143233 (PMC4654558; doi:10.1371/journal.pone.0143233)
Supplement: S1 File — (XLS) [file pone.0143233.s001.xls]

## Sheet: Sheet1
The measurements of craniofacial structures and hyoid position in the treated patients
Patient number	SNA		SNB		ANB		MP/SN		A-VRL		B-VRL		U1/SN		U1-VRL		L1/MP		L1-VRL		U6/SN		U6/PP		U6-VRL		L6/MP		L6-VRL		H-MP		H-C3		H-Rgn		H-FH
	T0	T1	T0	T1	T0	T1	T0	T1	T0	T1	T0	T1	T0	T1	T0	T1	T0	T1	T0	T1	T0	T1	T0	T1	T0	T1	T0	T1	T0	T1	T0	T1	T0	T1	T0	T1	T0	T1
1	80.4	79.9	75	74.4	5.4	5.55	40.1	37.25	66.1	60.45	52.4	53.5	93.5	83.4	66.1	61.1	98.5	94.4	64	58.8	68.5	66.7	77.1	76.9	40.2	41.45	88.5	94.65	43	42.8	4.6	2.65	30.9	30.35	29.7	30.2	74	72.25
2	87.6	86	81	81.05	6.7	4.95	39.1	37	62.1	63.1	57.3	57.5	113.1	98.8	74.1	69.15	99.7	91.5	70.6	67.2	79.8	77.3	85.1	87.8	45.5	45.2	98.6	86.45	46.9	48.5	-0.3	2.2	32.3	31.35	27.2	26.8	69.7	72.5
3	87	86.1	80.9	80.7	6	5.4	37.7	37.1	66.3	66.7	60.4	60.2	109.2	92.8	75.8	70.7	95	88.4	70.4	67.6	82.6	77.1	89.9	85.7	47.7	46.5	99.2	99.2	48.8	48.7	14.2	10.2	35.2	34.2	34.2	27.8	88.5	87.3
5	84.5	84.9	79.7	82.15	4.8	2.75	41.7	39.8	64.8	65.7	64.8	66.8	106.1	97.7	77	72.3	80.9	76.55	71.2	68.9	74.9	72.8	88.8	88.4	48.7	48.85	103.4	104.5	50.5	51.8	13.5	12.55	34.2	33.3	37.9	36.15	79.6	78.3
6	90.1	89.15	84.4	82.55	5.7	6.6	37.7	39.2	60.2	61.05	54.3	51.8	108.1	97.05	67.8	62.2	97.2	89.75	64.3	60.5	85.6	72.85	90.1	77.35	39.5	38.9	98.2	101.25	41.4	41	13.4	11	32.2	29.5	31	28.4	87.4	86.85
9	79.3	80.3	74.7	76.4	4.6	3.9	46.9	45.7	60.2	59.15	56.4	54.2	107.5	96.65	71.5	64.85	88.3	80.45	68.7	63	76	75.8	88.9	87.85	45.8	44.5	97.3	99.3	43.6	44.5	-1.6	0.95	26.6	25.75	29.6	27.85	77.8	83.25
10	87.2	84.2	82.1	78.9	5	5.3	38.6	39.7	66	67.4	62.1	63	114.4	89.4	78	71.5	95.9	91.4	70.8	68.5	71.2	66.8	83.1	78.4	46.9	48	94.2	97.1	48.2	48.8	10	11.5	26.9	27.7	32.3	33.9	80.9	81.5
13	75.9	76.5	70.7	69.85	5.2	6.6	47.6	45.1	54.4	54.65	50.5	48.65	105	80.95	70.6	60.55	113	107.65	64.4	58.35	70.7	63.5	84.1	77.2	41.6	39.65	94.5	90.3	38.8	39.9	16.5	22.4	33.9	33.4	31	35.85	87.6	92.2
15	78	73.9	73.1	69.5	4.9	4.5	43.45	45.5	59.95	59.8	52.4	49.8	113.9	90.9	70.6	60.7	101.6	97.8	68.9	58.5	61.6	62.2	72.45	77.4	37.95	38.7	98.2	103.2	40.1	39.2	17.05	16	29.4	28.9	34.15	27.8	77.3	79.6
16	88.4	91.15	83.5	85.1	4.9	6.05	43.6	42.5	58	56.45	53.6	51.8	105	99.1	64.3	62.25	78.8	81.45	60.2	60.4	75.6	77.1	80.6	84.15	40.8	41.95	106.2	106.3	42.9	42.4	12	9.85	28.7	29.75	26.4	32.3	82.6	76.4
17	83.6	85.9	77.2	78.5	6.4	7.4	37.7	32.1	68	65.5	56.7	57.6	109.7	90.4	75	69	108.1	96.5	69.1	66.1	81.8	74.4	92.7	81.7	44.3	42.1	90.4	101.4	40.8	43.4	13.9	15.2	38.4	39.2	37.5	41.4	83.3	82.2
18	81.6	84.1	76.3	78.4	5.3	5.8	41	41.9	53.5	57.1	47.85	49.9	112.4	88.7	62.5	58.4	102.75	96.8	58.25	56.2	74.8	71.1	84.15	81.1	34.9	36	100.55	102.5	36.35	38.6	12.9	6.1	33.3	35.3	35.35	18.4	70.4	72.8
19	82.1	85	75.7	80.55	6.5	4.4	42.5	40	61.1	59.5	56	53.65	113.25	102.35	74.2	64.8	90.85	92.15	66.55	62.6	78.95	79.5	90	89.15	43.7	43.3	103.05	103.25	46.6	45.1	8.1	10.3	27.35	30.9	22.6	26.25	84.65	84.05
20	77.2	77.8	71.7	73.05	5.5	4.75	40.8	38.2	59.45	59	50.55	52.7	82.8	82.95	64.2	62.7	92.05	90.65	59.8	59.95	70.15	67.8	85.15	82.3	40.15	40.45	91.9	96.7	41.05	43.5	7.15	5.6	31.9	31.25	34.7	35.25	83.85	82.4
21	85.7	85.25	80.9	79.7	4.8	5.5	38	39.1	60.2	62.6	59.3	57.5	114.7	85.5	72.4	63.05	96.8	90.05	68.4	62.3	80.3	73.95	92.8	85.6	42.5	43.3	98.6	100.9	44.7	43.65	-1.6	0.1	31.2	31.3	30.4	28.3	62.2	66.1
22	89.8	87.7	85	84.5	4.8	3.2	37.8	39.2	64.9	61.65	58.6	56.35	107.2	104.4	72.1	66.8	97.7	93.6	71	64.4	75.7	77.45	78.9	78.7	42.1	41.95	96.5	99.65	44.7	45	13.1	13.5	42	42.4	28	33.9	107.4	101.8
23	82.4	84.25	77.7	80.75	4.7	3.5	38.1	38	66	66.45	61.5	61.1	115.2	103.15	78.5	73.5	97.3	86.4	76.9	70.45	81.2	78.5	88.7	85.65	47.3	49	98.6	105.05	50.8	50.6	6.6	6.8	41.7	42.75	31.9	37.3	85.4	84.75
24	81.2	83.7	75.8	78.9	5.4	4.8	39.8	40.4	61.1	60.6	51.9	52.1	108.65	89.4	67.95	60	93.85	100	60.9	58.7	72.35	68.4	75.5	73.2	41.25	41	92.7	97.9	37.6	38	16.15	13.6	30.25	30.3	30.15	28.2	83.5	81.8
