# Supplementary material for: Upper Airway Changes after Orthodontic Extraction Treatment in Adults: A Preliminary Study using Cone Beam Computed Tomography
Source: PLoS One. 2015 Nov 20;10(11):e0143233. doi: 10.1371/journal.pone.0143233 (PMC4654558; doi:10.1371/journal.pone.0143233)
Supplement: S3 File — (XLSX) [file pone.0143233.s003.xlsx]

## Sheet: Sheet1
The volume, height, and area of the upper airway in the untreat matched controls
Patient number	Naso-V	Naso-H	Naso-Mean	Velo-V	Velo-H	Velo-Min	Velo-Mean	Hypo-V	Hypo-H	Hypo-Min	Hypo-Mean	Total-V	Total-H	Total-Mean
1	5817.8	14.3	406.8	10652.1	27.9	264.7	381.8	10127.1	38.5	216.1	263	26202.3	81	323.5
2	6219.6	17.7	351.4	9120.2	23.9	267	381.6	11701.6	39.7	266.6	294.8	26723.4	85.2	313.7
3	6738	15.4	437.5	10186.9	24.1	251.4	422.7	11719.2	32	268.9	366.2	28250	83.4	338.7
4	4176.5	14.1	296.2	12734	31.8	301.1	400.4	15886.6	35.8	362.1	443.8	32441.1	83.7	387.6
5	5041.6	13.8	365.3	16961.6	32.7	392.5	518.7	13748.2	31.5	377.4	436.5	35333.4	89.5	394.8
6	5696.4	14.7	387.5	6317	22.1	141.7	285.8	5446.8	30.7	126.6	177.4	17107.9	69.3	246.9
7	6338.7	13.5	469.5	10600.6	25.2	279.3	420.7	9302.7	37.8	213.8	246.1	25921.7	77.3	335.3
8	4518.3	13.6	332.2	12830.2	28.3	358.8	453.4	17989.3	34.6	419.6	519.9	35493.1	87.3	406.6
9	3607	12.8	281.8	11782.3	30.5	335.6	386.3	19184.1	39	388.7	491.9	34156.9	84.5	404.2
10	8529.6	16.3	523.3	16196	26.4	422.3	613.5	9978	32	253.5	311.8	34045.4	76.5	445
11	6305.8	18.3	344.6	11319.3	26.6	295.7	425.5	7729.3	35.8	258.2	215.9	24880.2	72.7	342.2
12	6621.6	17.6	376.2	10367	28.2	257.2	367.6	7753.2	38.8	248.6	199.8	24330.9	75.3	323.1
13	5515.6	16.7	330.3	7846.1	36.7	100.5	213.8	5702.7	39.5	133.7	144.4	18755.9	83.3	225.2
14	3830.5	12.3	311.4	6520.3	20.9	246.6	312	7059.3	28.8	136.8	245.1	17031.1	63.7	267.4
15	6792.5	13.7	495.8	12613.1	25.8	332	488.9	13353.7	36.8	324.8	362.9	32310.7	78.3	412.7
16	6707	17.6	381.1	8557	23.1	184.5	370.4	5447.8	26.7	179.2	204	20383	69.1	295
17	3313.5	14	236.7	7380.9	28.7	203.2	257.2	4629.8	26.3	137.5	176	15095.8	69.7	216.6
18	6173	17	363.1	8346.3	27.6	167.9	302.4	11661.2	34.9	208.1	334.1	25880.4	81.3	318.3
